# Supplementary material
Source: PubMed Central journal article supplement (PMC5659275)
Supplement: NIHMS889191-supplement-Supplemental_Digital_Content.pdf [file NIHMS889191-supplement-Supplemental_Digital_Content.pdf]

## Appendix 1. Description of Patients With Early Second-Trimester Growth Restriction and Stillbirth

| Patient Number | Gestational Age and Estimated fetal weight Percentile at Early Second Trimester Scan | Gestational Age at IUFD | Details of IUFD                                                                                                                                                                                                                                                                                                                    |
|----------------|--------------------------------------------------------------------------------------|-------------------------|------------------------------------------------------------------------------------------------------------------------------------------------------------------------------------------------------------------------------------------------------------------------------------------------------------------------------------|
| 1              | 19 2/7<br><5%                                                                        | 20 3/7                  | Patient with renal transplant and chronic hypertension<br>Initial work up negative, declined amniocentesis/cffDNA<br>Presented with severe preeclampsia and IUFD<br>Remainder of IUFD work up negative, Autopsy/CMA/karyotype declined                                                                                             |
| 2              | 19 2/7<br><5%                                                                        | 20 4/7                  | Initial work up negative, Negative cffDNA, declined amnio<br>Presented with abruption and IUFD<br>Remainder of IUFD work up negative, Normal CMA and karyotype, autopsy declined                                                                                                                                                   |
| 3              | 21 4/7<br><5%                                                                        | 22 6/7                  | Declined initial work up<br>Presented with severe preeclampsia and IUFD<br>IUFD work up negative, Autopsy/CMA/karyotype declined                                                                                                                                                                                                   |
| 4              | 21 0/7<br><5%                                                                        | 22 6/7                  | Patient with SLE and glomerular nephritis<br>Initial work up negative, declined amniocentesis/cffDNA<br>Presented with severe preeclampsia and IUFD<br>IUFD work up negative, declined autopsy/CMA                                                                                                                                 |
| 5              | 20 0/7<br><5%                                                                        | 24 6/7                  | Patient with chronic hypertension and type 2 diabetes<br>Initial work up negative, cffDNA was normal, declined amniocentesis<br>Remained growth restricted on follow-up ultrasounds, developed reversed end-diastolic flow on umbilical Dopplers at 24 weeks<br>Presented with IUFD<br>IUFD work up negative, declined autopsy/CMA |

Temming LA, Dicke JM, Stout MJ, Rampersad RM, Macones GA, et al. Early second-trimester fetal growth restriction and adverse perinatal outcomes. *Obstet Gynecol* 2017; 130.  
The authors provided this information as a supplement to their article.

©2017 American College of Obstetricians and Gynecologists.

| Patient Number | Gestational Age and Estimated fetal weight Percentile at Early Second trimester scan | Gestational Age at IUFD | Details of IUFD                                                                                                                                                                                                                                                                             |
|----------------|--------------------------------------------------------------------------------------|-------------------------|---------------------------------------------------------------------------------------------------------------------------------------------------------------------------------------------------------------------------------------------------------------------------------------------|
| 6              | 18 6/7<br>9%                                                                         | 25 1/7                  | Initial work up negative, declined amniocentesis/cffDNA<br>Remained growth restricted on follow-up ultrasound, no umbilical artery Dopplers performed<br>Presented with IUFD<br>IUFD work up negative, CMA/karyotype normal, autopsy declined                                               |
| 7              | 20 4/7<br><5%                                                                        | 26 0/7                  | Initial FGR work up negative including karyotype/CMA<br>Remained growth restricted and developed oligohydramnios, no umbilical artery Dopplers performed<br>Presented with IUFD at 26 weeks<br>IUFD work up negative, Autopsy/CMA/karyotype declined                                        |
| 8              | 20 1/7<br><5%                                                                        | 32 3/7                  | Initial work up negative, negative cffDNA and declined amniocentesis<br>Remained growth restricted on follow up with normal umbilical artery Dopplers<br>Presented with abruption and IUFD<br>Remainder of IUFD work up negative, Autopsy/CMA/karyotype declined                            |
| 9              | 19 5/7<br><5%                                                                        | 35 6/7                  | Patient with type 2 diabetes<br>Initial work up negative, declined amniocentesis/cffDNA<br>Remained growth restricted on follow up with normal umbilical artery Dopplers<br>Presented at 35 6/7 with IUFD<br>IUFD work up negative except for Hb A1c of 7.6, Autopsy/CMA/karyotype declined |
